# Supplementary material for: Rapid Identification of Adulteration in Edible Vegetable Oils Based on Low-Field Nuclear Magnetic Resonance Relaxation Fingerprints
Source: MDPI journal article supplement (doi:10.3390/foods10123068), 2021-12-09
Supplement: s1 [file s1]

# **Rapid identification of adulteration in edible vegetable oils based on low-field nuclear magnetic resonance relaxation fingerprints**

Zhi-Ming Huang,<sup>1</sup> Jia-Xiang Xin,<sup>1</sup> Shan-Shan Sun,<sup>2</sup> Yi Li,<sup>1</sup> Da-Xiu Wei,<sup>1</sup> Jing Zhu,<sup>1</sup> Xue Lu Wang,<sup>1</sup> Jiachen Wang,<sup>1</sup> Ye-Feng Yao<sup>1\*</sup>

<sup>1</sup> Shanghai Key Laboratory of Magnetic Resonance, College of Physics and Electronic Science, East China Normal University, Shanghai 200062, China; 15800959127@163.com (Z.-M.H.); 18366102713@163.com (J.-X.X.); riki941112@gmail.com (Y.L.); dxwei@phy.ecnu.edu.cn (D.-X.W.); jzhu@phy.ecnu.edu.cn (J.Z.); xlwang@phy.ecnu.edu.cn (X.L.W.); jcwang@phy.ecnu.edu.cn (J.W.)  
<sup>2</sup> National Institutes for Food and Drug Control, Dongcheng District, Beijing 100050, China; shanshans112@163.com (S.-S.S.)

\* Correspondence: yfyao@phy.ecnu.edu.cn

**Table S1.**  $T_1$  and  $T_2$  relaxation times of six edible vegetable oils.

| Edible vegetable oils | $T_1$ (ms) | $T_2$ (ms) |
|-----------------------|------------|------------|
| Soybean oil (SO)      | 164.5      | 150.4      |
| Olive oil (OL)        | 139.6      | 119.0      |
| Peanut oil (PO)       | 145.1      | 125.5      |
| Flaxseed oil (FO)     | 193.5      | 188.7      |
| Corn oil (CO)         | 158.4      | 145.0      |
| Sunflower oil (SFO)   | 176.3      | 141.3      |

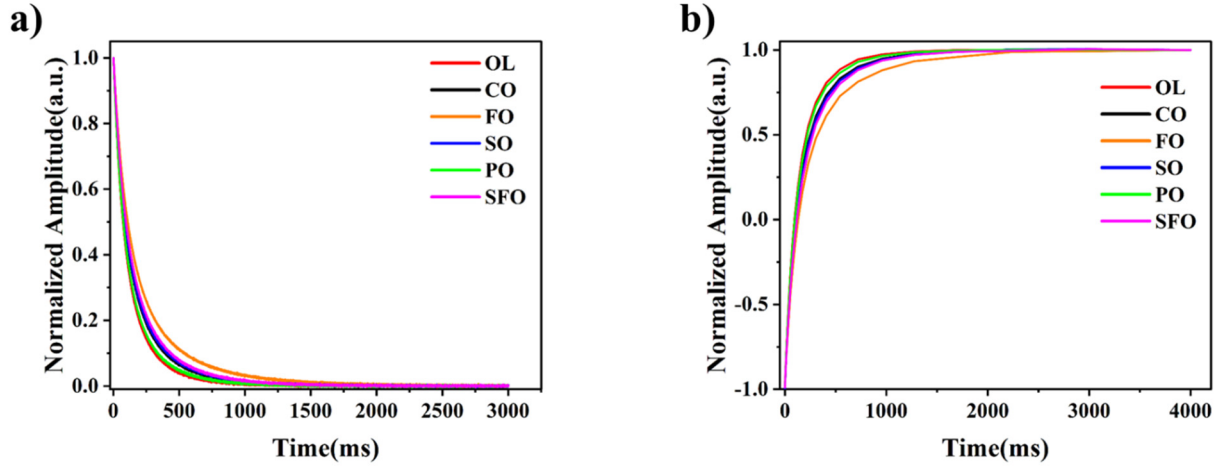

**Figure S1.** Relaxation curves of the six edible vegetable oils: a)  $T_2$ ; b)  $T_1$ .

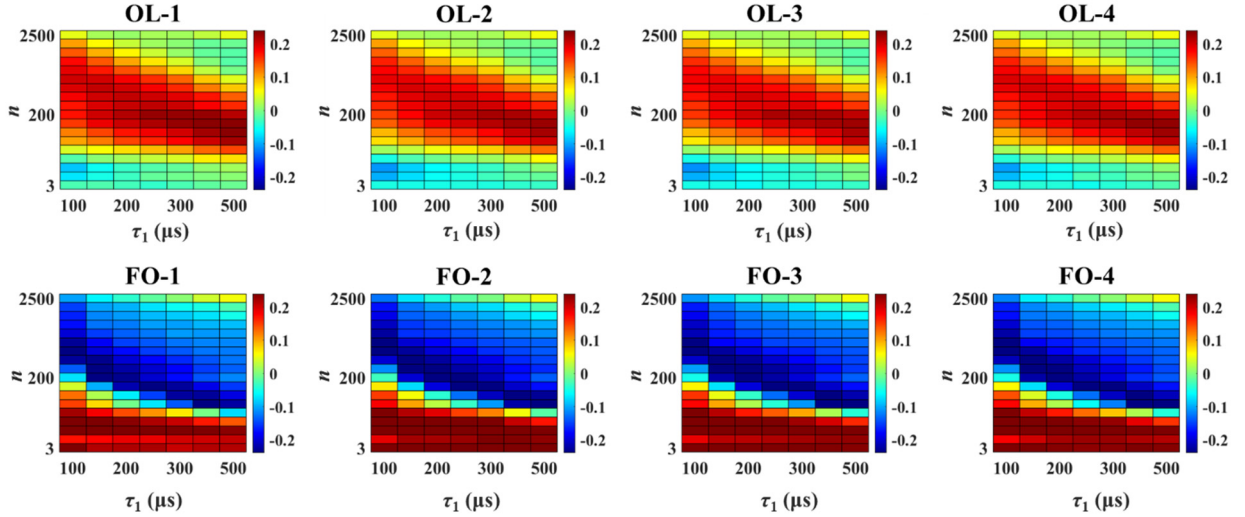

**Figure S2.** NMR relaxation fingerprints in the form of heat map plots obtained for four different brands of OL and FO.

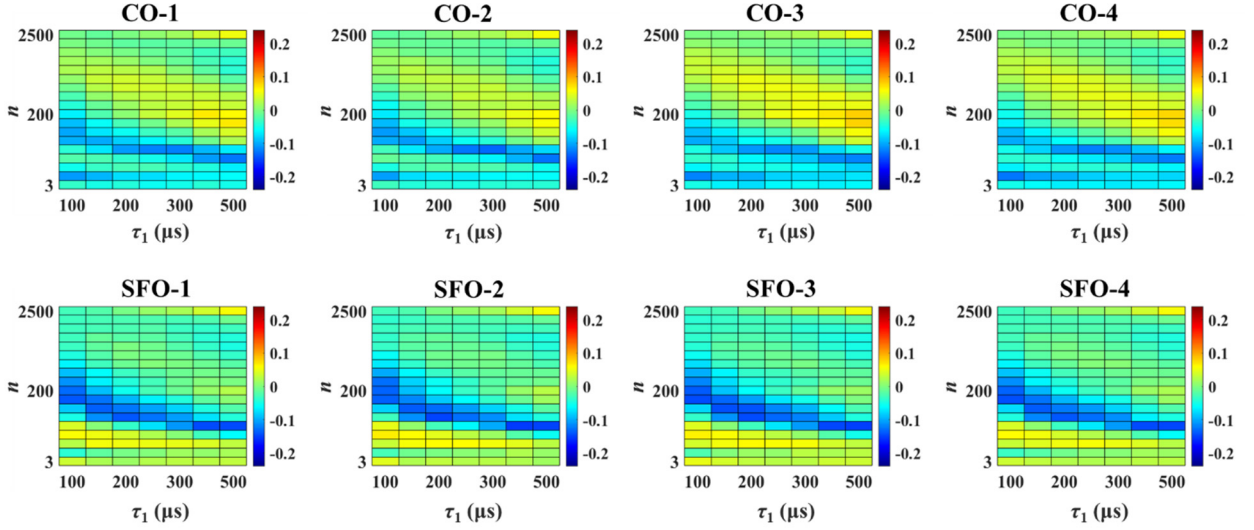

**Figure S3.** NMR relaxation fingerprints in the form of heat map plots obtained for four different brands of CO and SFO.

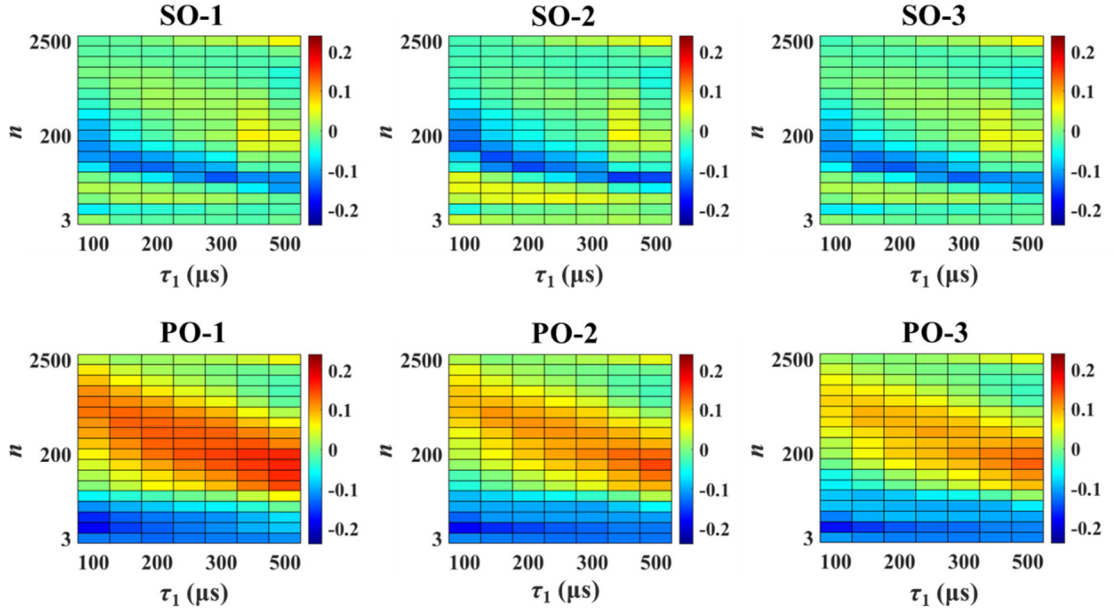

**Figure S4.** NMR relaxation fingerprints in the form of heat map plots obtained for three different brands of SO and PO.

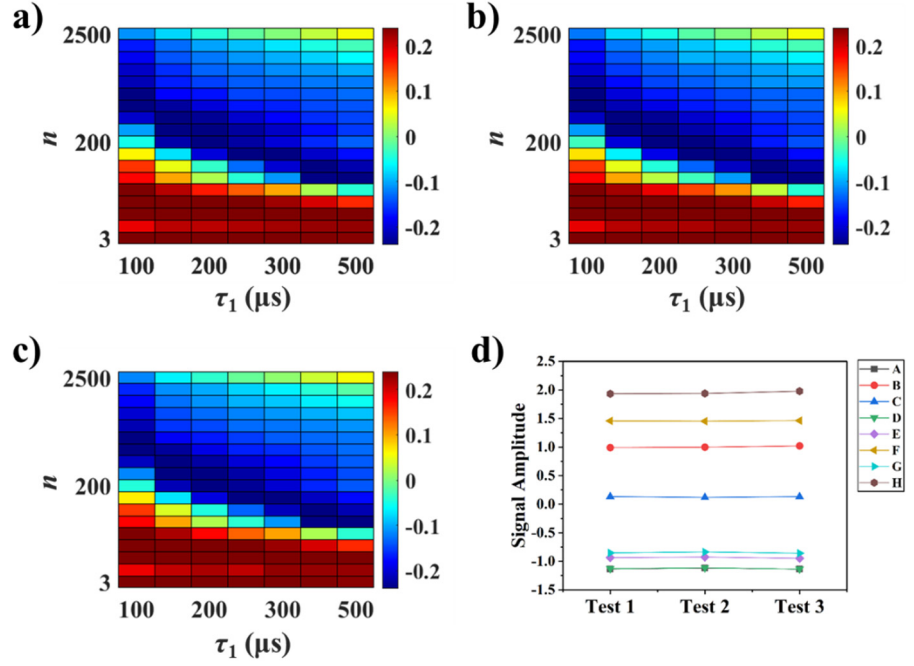

**Figure S5.** Results of method stability testing, where equivalent  $f(\tau_1, n)$  data were acquired for the same FO sample using the same instrument on the same day but at the different times: a) morning (Test 1); b) afternoon (Test 2); c) evening (Test 3). d) Plot of the signal intensity obtained for each of the eight regions defined in Figure 3a for each test.

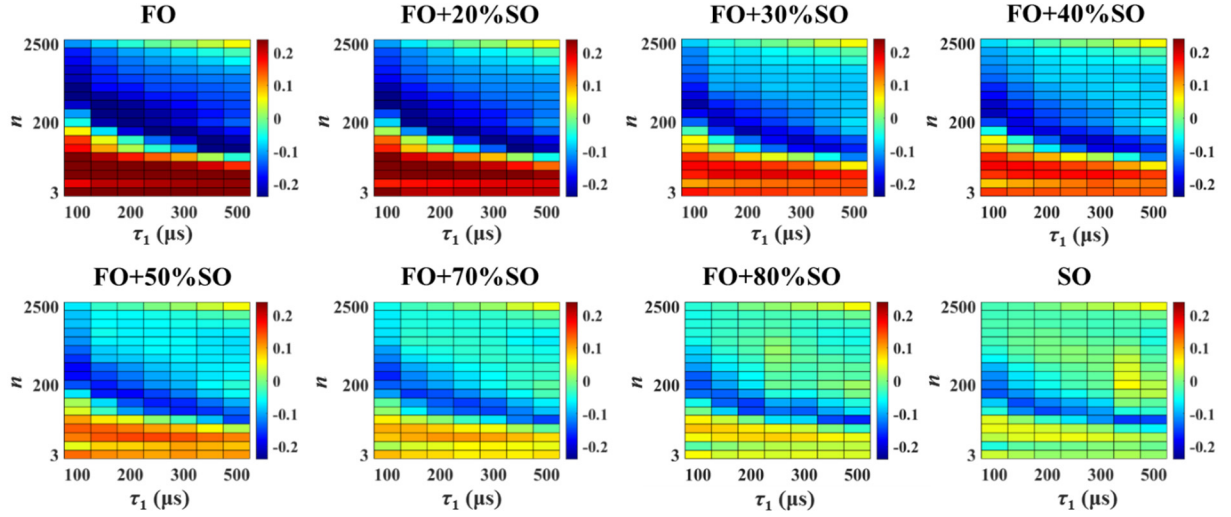

**Figure S6.** NMR relaxation fingerprints in the form of heat map plots for FO and SO samples, and a series of mixed FO-SO samples with different adulteration ratios in the validation dataset.

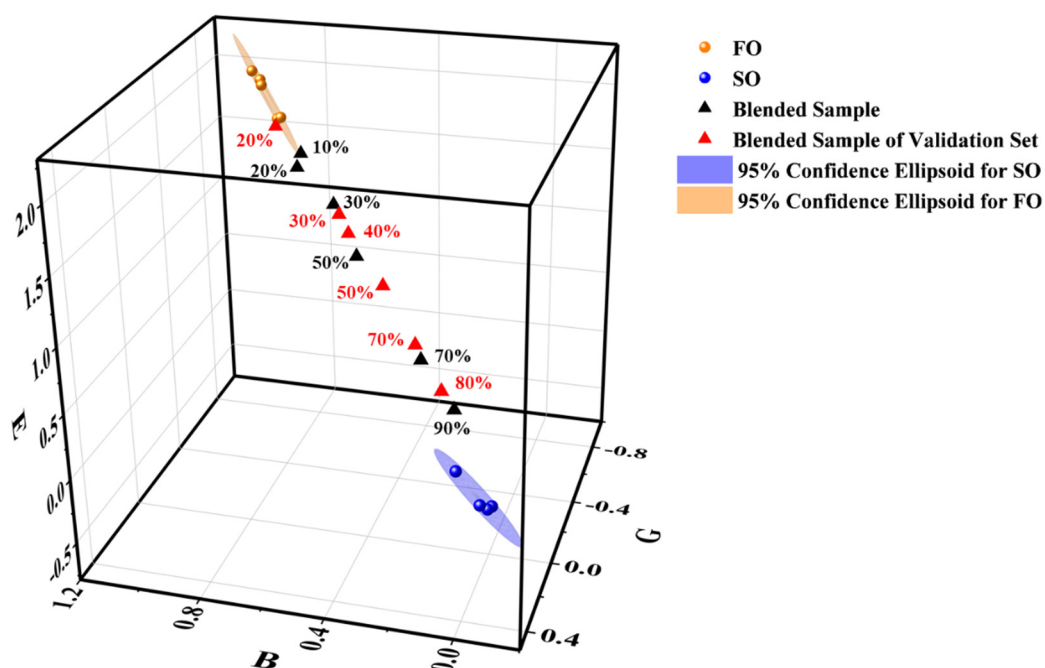

**Figure S7.** Signal intensities of the B, E, and G regions of the heat map plots in Figure S6 within the 3D characteristic coordinate system with the 95% confidence ellipsoids corresponding to the FO and SO clusters. The data points plotted in Figure 6 are included here for comparison.

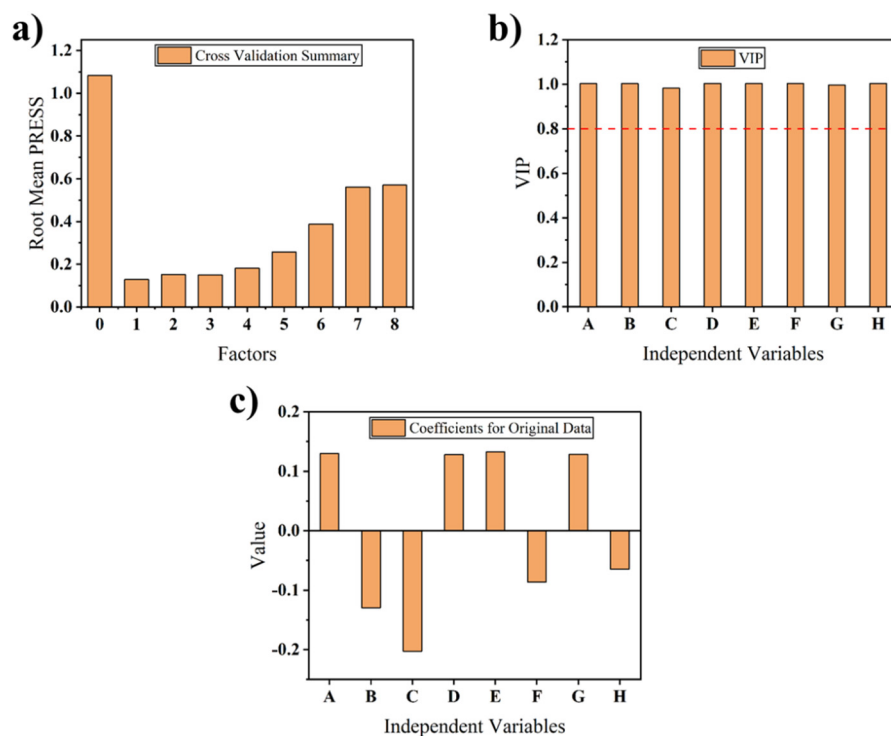

**Figure S8.** a) Root mean PRESS values obtained for factors 1–8 from cross validation as a metric for determining the number of significant factors in the PLSR model. b) Variable importance plot (VIP) of independent variables A–H. c) Coefficient plot for the PLSR model.
